# Supplementary material
Source: PubMed Central journal article supplement (PMC1449631)

Absorbance of the gold colloids after 5' of exposure to different concentrations of peptide 2 (15AA-3Ac) and 2 devoid of the last Cys (14AA-3Ac)

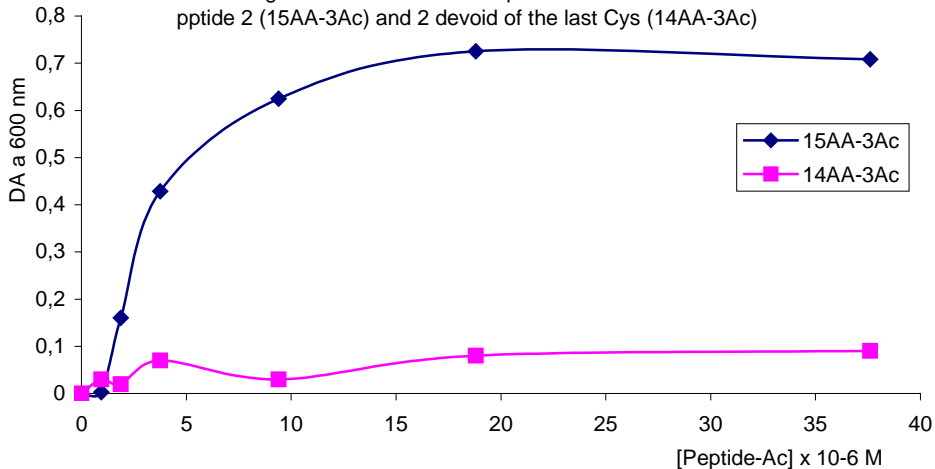

Supplement: pnas_0509372103_9.pdf [file pnas_0509372103_9.pdf]
