# Supplementary material
Source: PubMed Central journal article supplement (PMC1449631)

Mariner Spec /3:10 (T /0.34:1.56) ASC[BP = 370.2, 4114]

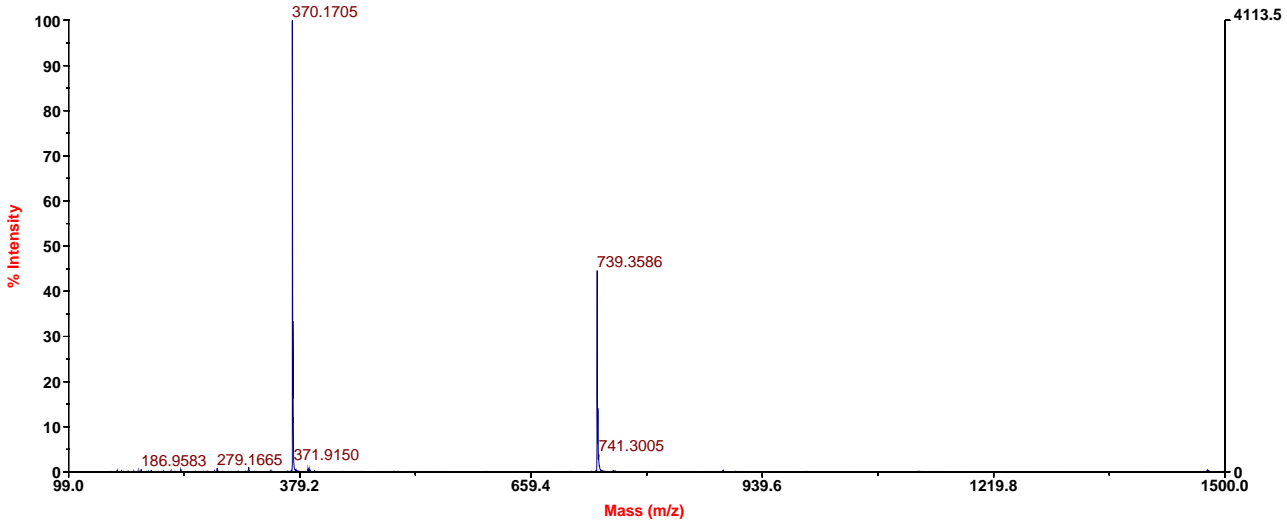

Supplement: pnas_0509372103_1.pdf [file pnas_0509372103_1.pdf]

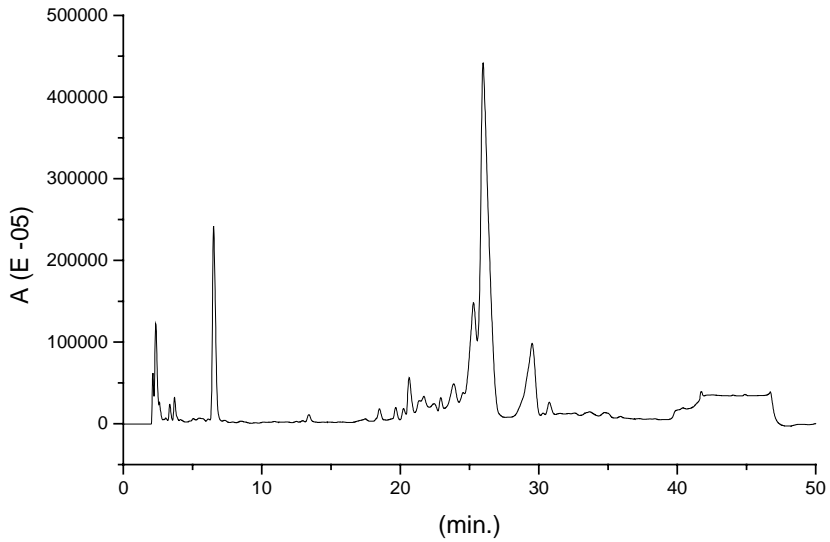

Supplement: pnas_0509372103_2.pdf [file pnas_0509372103_2.pdf]

Mariner Spec /3:6 (T /0.34:0.78) ASC[BP = 865.4, 8234]

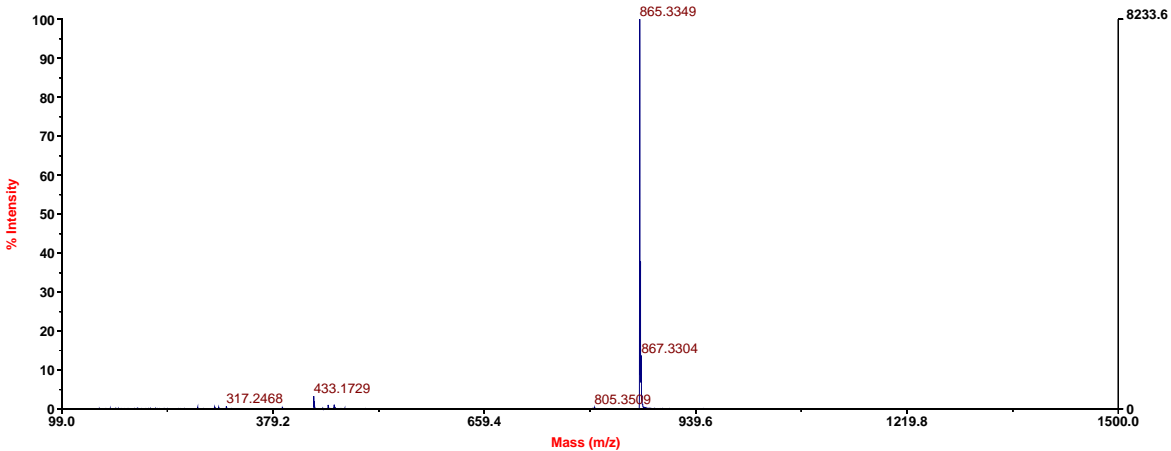

Supplement: pnas_0509372103_3.pdf [file pnas_0509372103_3.pdf]

Mariner Spec /3:7 (T /0.34:1.04) ASC[BP = 663.2, 3854]

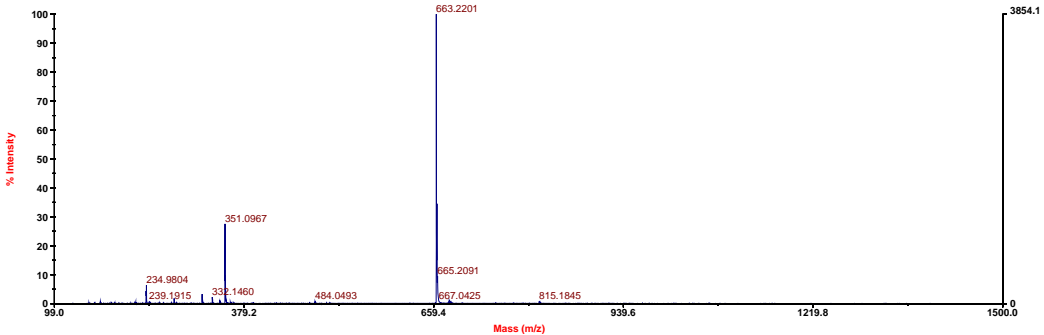

Supplement: pnas_0509372103_6.pdf [file pnas_0509372103_6.pdf]

# Kinetic of hydrolysis of 1 by THB

Substrate (7Aa-3Ac) [61,6  $\mu$ M] 5mM Tris-HCl; NaCl 0.2M; PEG 8000 (0.1%); pH= 8

—◆— THB 44.48 nM

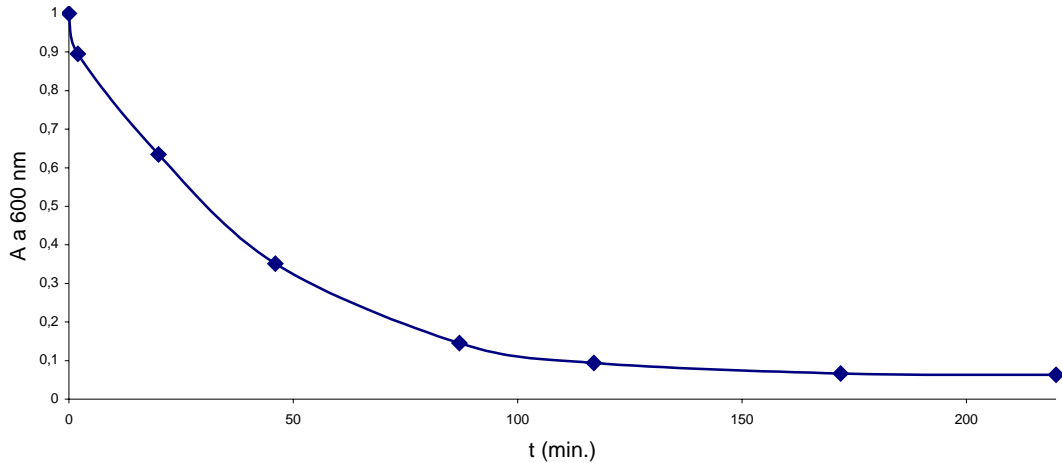

Supplement: pnas_0509372103_7.pdf [file pnas_0509372103_7.pdf]
